# Supplementary material
Source: publisher figshare collection journal article supplement (https://geolsoc.figshare.com/ndownloader/files/14298977)
Supplement: Supplementary file 1 [file 14298977]

## Sheet: Sheet1
Ch. 4, Table S4 Volcanic rocks ICP-MS
Sample	N13 35	N13 36	N13 38	N13 39	N13 41	N13 42	N13 43		N13 147	N13 148	N13 149	N13 162	N13 164	N13 167	N13 169	N13 170	N13 171	NZ17-89	NZ17-90		NZ17-129	NZ17-133		N13 227	N13 243	NZ17-159	NZ17-160	NZ17-165	NZ17-167	NZ17-178
Rock type	basaltic dyke	basalt flow	basaltic dyke	basaltic dyke	baasalt flow	basalt flow	basaltic dyke		dolerite dyke	dolerite dyke	dolerite dyke	basalt flow	basalt flow	dolerite dyke	dolerite dyke	basalt flow	basalt flow	pillow basalt	pillow basalt		Basalt flow	Clinopyroxene-phyric basalt		bsalt	basalt flow	basalt	basalt	basalt	basalt	basalt
Area									Redcliff Creek	Redcliff Creek	Redcliff Creek	Princhester Creek	Princhester Creek	Princhester stream	Princhester Creek	Princhester Creek	Princhester Creek	Elbow Creek	Elbow Creek		Spear Grass Creek	Spear Grass Creek		Grampian Reserve	Jickell's bridge, Maitai R.	Grampian Reserve	Grampian Reserve	Cable Bay Rd.	Cable Bay Rd.	Brook Street Motor Camp
Stratigraphy									Brunel Fm.	Brunel Fm.	Brunel Fm.	Elbow Fm.	Elbow Fm.	Elbow Fm.	Elbow Fm.	Elbow Fm.	Elbow Fm.	Caravan Fm.	Caravan Fm.		Kaka Fm.	Kaka Fm.		Grampian Fm.	Grampian Fm.	Grampian Fm.	Grampian Fm.	Kaka Fm.	Kaka Fm.	Kaka Fm.
Region	Riverton	Riverton	Riverton	Riverton	Riverton	Riverton	Riverton		Takitimu Mtns.	Takitimu Mtns.	Takitimu Mtns.	Takitimu Mtns.	Takitimu Mtns.	Takitimu Mtns.	Takitimu Mtns.	Takitimu Mtns.	Takitimu Mtns.	Wairaki Hills	Waikarki Hills		St. Arnauld	St. Arnauld		Nelson	Nelson	Nelson	Nelson	Nelson	Nelson	Nelson
GPS	S46 38477 E168 03666	S46 38440 E168 03785	S46 38327 E168 03809	S46 38287E168 03798	S46 38084 E168 03566	S46 37965 E168 03239	S46 37332 E168 03043		S445 73016E167 74447	S445 73016E167 74447	S445 73016 E167 74447	S445 61211 E167 92558	S445 61387 E167 92181	S445 61211 E167 91676	S445 61264 E167 91516	S445 60752 E167 93177	S445 60752 E167 93177	58G 29348 UTM 49 24315	58G 29348 UTM 49 24315		59G 49078 UTM 53 69804	59G 49681 UTM 53 69777		S 41 29440 E 173 28706	S41 27518 E173 32181	59G 91378 UTM54 25979	59G 91378 UTM54 25979	59G 02553 UTM54 36247	59G 02553 UTM54 36247	59G 92264 UTM54 25392
																									77
Trace elements & REEs
Ba	17	10	16	45	39	4	36		48	131	43	75	42	63	57	51	40	60	77		9	191		351	36	281	212	20	19	24
Be	2	2	1	<1	<1	<1	2		1	4	1	1	1	<1	<1	<1	2	<1	<1		<1	2		1	<1	<1	2	<1	<1	<1
Co	42.4	62.6	41.6	61.9	41.2	39.7	46.3		38.9	33.9	29.8	52.4	36.7	45	40.4	42	94.9	37.8	23.3		45.7	48.8		24.4	52.3	10	4.7	44.1	48.1	43
Cs	0.1	<0.1	<0.1	<0.1	<0.1	0.3	0.1		0.7	0.9	0.3	0.3	<0.1	0.1	<0.1	0.1	0.3	0.1	<0.1		0.2	2.3		1.4	0.1	1.4	2.2	0.6	0.7	0.5
Ga	18.1	11.4	12.2	13.3	17.4	12.7	12.2		16.2	18.7	15.8	14.9	19.2	12.6	15.6	16.9	16.9	14.8	16.7		13.7	16.4		15.2	12	11.6	8.4	12.9	13.6	11.6
Hf	2.2	1.1	1.3	1.3	1.4	1.2	1.2		2.6	2.7	2.7	2	4.8	1.3	1.5	2.4	2.2	0.9	2		1.4	1.4		5.7	1.1	4.8	3.2	1.5	1.5	1.8
Nb	2.2	1	1	0.9	1	0.8	1		6.8	7.5	5.6	1.3	3.3	0.7	0.5	1.3	2.1	0.4	1.7		1.5	1.2		7.1	0.8	5.8	4.6	1	1	1
Rb	2.7	0.7	0.9	5.8	6.2	0.4	4.4		10.4	18.1	6	15.6	5.1	12.1	4.9	4.9	6.5	7	7.8		0.5	45.8		39	3.9	46.6	63.8	2.8	4.5	12.1
Sn	3	<1	<1	<1	<1	<1	<1		<1	<1	1	<1	1	<1	<1	<1	1	<1	<1		<1	<1		3	<1	2	2	<1	<1	<1
Sr	333.3	147.1	434.2	631	589.8	161.4	225.3		305	373.6	465.4	522.4	481.4	515.8	424.8	504.7	331.3	368.4	509		262.9	356		207	304.4	307.2	295.9	99.7	152.6	355.4
Ta	1.8	2.8	1.3	1.2	1.4	1.9	2.4		1.2	2.8	1.8	4.4	5.3	2.3	2.9	3.4	7.7	0.3	0.3		0.1	0.2		3.3	3.7	0.9	0.6	0.9	1	0.7
Th	0.2	0.2	0.2	0.2	0.2	0.2	0.2		0.4	0.4	0.6	0.4	0.6	0.4	0.2	0.5	0.5	0.3	0.7		0.8	0.9		9.5	0.4	7.6	6.8	0.3	0.3	0.8
U	0.2	0.2	0.1				0.1		0.4	0.3	0.1	0.3	0.6	0.1	0.2	0.4	0.3	0.1	0.4		0.3	0.1		2.4	0.2	1.8	1.8	<0.1	0.1	0.7
V	323	237	268	286	261	228	279		332	332	301	276	148	255	200	288	292	309	288		316	287		67	294	63	32	276	299	306
W	154.4	279.2	101.9	75.3	99.4	157.2	219.7		78.5	135.6	134.6	290.3	360.1	232.1	222.9	239.1	967.1	21.2	19.1		41.2	77.4		247.1	257.4	54.6	32.2	79.6	80.3	80.6
Zr	79.4	40.1	44.9	46.5	41.7	39.7	39.2		103.2	112.5	92.6	66.5	170.4	43.4	38.8	77.2	79.5	24.6	65.1		47.9	44.9		216.6	31.1	178.5	116.4	45.5	54.7	53.1
Y	21.5	11.9	14.4	15	13.9	12.6	13.6		26	26.5	22.9	20.3	32.7	13.5	14.5	18.1	21.1	11.2	16.1		18.8	17.2		25.4	13.4	20.7	19	16.7	19.1	21.2
La	4.9	3.8	3	3.7	2.7	3.3	3.3		8.5	9.2	8.1	8.1	12	5.5	4.2	7.2	6.8	3.1	7.7		5.6	6.2		24.9	3.5	20.7	17.8	3.3	3.5	5
Ce	14.5	9.3	9.2	9.8	8.1	9.1	7.4		22.1	24.7	20.3	21.2	32.4	14.9	10.5	18.4	17.4	6.6	19.5		12.7	14.3		53.9	6.7	43	35.6	9.2	9.7	12.6
Pr	2.14	1.28	1.32	1.39	1.13	1.25	1.2		2.86	3.13	2.58	2.96	4.55	2.07	1.53	2.6	2.5	1.03	2.74		1.79	2.03		6.23	1.08	4.97	4.22	1.41	1.53	1.92
Nd	10.6	6.4	7.2	6.2	5.5	6.7	6.4		15.2	15.2	12	14.8	21.7	10.8	7.6	13.7	12.8	5.3	12.5		9.2	9.7		24.5	5.9	19.5	16.2	7.6	8.2	9.8
Sm	3.09	1.68	2.08	2.16	1.53	1.79	1.83		3.67	4.2	3.71	3.55	5.93	3.13	2.22	3.28	3.34	1.53	3		2.47	2.52		5.1	1.71	3.96	3.44	2.21	2.51	2.78
Eu	1.05	0.68	0.78	0.67	0.59	0.78	0.7		1.44	1.43	1.2	1.25	1.79	0.95	0.75	0.99	1.09	0.61	1		0.94	0.88		0.93	0.72	0.87	0.55	0.87	0.92	0.94
Gd	3.41	1.99	2.31	2.51	2.4	1.89	2.05		4.45	4.74	3.87	3.88	5.49	2.75	2.6	3.6	3.72	1.72	3		2.99	2.89		4.61	2.25	3.79	3.36	2.78	3.21	3.55
Tb	0.63	0.36	0.43	0.44	0.4	0.35	0.4		0.74	0.79	0.68	0.69	0.96	0.43	0.43	0.55	0.63	0.32	0.47		0.53	0.47		0.78	0.37	0.62	0.54	0.5	0.55	0.62
Dy	3.65	1.96	2.92	2.56	2.53	2.22	2.32		4.76	4.76	3.85	3.68	5.52	2.62	2.68	3.24	3.83	1.98	2.94		3.28	3.03		4.49	2.41	3.69	3.38	3.09	3.41	3.91
Ho	0.85	0.54	0.53	0.58	0.53	0.47	0.56		1	1.03	0.9	0.77	1.24	0.55	0.61	0.75	0.81	0.45	0.59		0.73	0.61		0.95	0.51	0.79	0.69	0.71	0.75	0.84
Er	2.38	1.39	1.58	1.58	1.72	1.32	1.7		3.06	2.82	2.59	2.33	3.41	1.34	1.44	2.17	2.31	1.31	1.7		1.98	1.84		2.01	2.34	1.94	2.18	2.53	2.18	2.53
Tm	0.4	0.23	0.25	0.24	0.23	0.21	0.24		0.42	0.45	0.38	0.38	0.56	0.22	0.24	0.32	0.34	0.19	0.26		0.3	0.25		0.31	0.34	0.28	0.32	0.37	0.32	0.37
Yb	2.39	1.29	1.59	1.6	1.39	1.41	1.61		2.6	2.92	2.34	2.56	3.45	1.38	1.63	2.08	2.43	1.3	1.65		1.92	1.69		1.99	2.25	1.8	2.15	2.4	2.15	2.4
Lu	0.36	0.22	0.24	0.25	0.22	0.2	0.24		0.42	0.43	0.37	0.33	0.57	0.23	0.27	0.32	0.37	0.2	0.26		0.3	0.27		0.32	0.36	0.29	0.31	0.38	0.31	0.38
